# Supplementary material for: MicroRNA Array Analysis Finds Elevated Serum miR-1290 Accurately Distinguishes Patients with Low-Stage Pancreatic Cancer from Healthy and Disease Controls
Source: Oxford University Press journal article supplement (doi:10.1158/1078-0432.ccr-12-3092), 2013-05-23
Supplement: 10780432ccr123092-sup-table_s4.xlsx [file 10780432ccr123092-sup-table_s4.xlsx]

## Sheet: Suppl. Table S4
Supplemental Table S4. MicroRNAs elevated in serum of patients with pancreatic cancer relative to normal controls by microarray analysis
No.	miRNA ID	F.C.	P.	FDR		No.	miRNA ID	F.C.	P.	FDR
1	hsa-miR-422a	862.588	0.000809765	0.0352826		50	hsa-miR-151-3p	2.23899	0.0116167	0.0760975
2	hsa-miR-638	774.979	0.00024218	0.0352826		51	hsa-miR-30d*	5.12708	0.0150236	0.0803894
3	hsa-miR-541*	633.742	0.000809765	0.0352826		52	hsa-miR-134	4.01005	0.0150236	0.0803894
4	hsa-miR-770-5p	263.573	0.000488438	0.0352826		53	hsa-miR-30a-5p	2.31119	0.0150236	0.0803894
5	hsa-miR-661	16.4765	0.000289457	0.0352826		54	hsa-miR-20a*	320.907	0.0170363	0.0824773
6	hsa-miR-320B	5.07802	0.000685534	0.0352826		55	hsa-miR-454*	3.70508	0.0170363	0.0824773
7	hsa-miR-744*	6.74794	0.000954632	0.0363953		56	hsa-miR-769-5p	3.52995	0.0170363	0.0824773
8	hsa-miR-26b*	3.88773	0.00112321	0.0380643		57	hsa-miR-652	3.10427	0.0170363	0.0824773
9	hsa-miR-22	4.8552	0.00131896	0.0402283		58	hsa-miR-744	3.10222	0.0170363	0.0824773
10	hsa-miR-15b*	793.578	0.00211077	0.0459846		59	hsa-miR-423-5p	2.15182	0.0170363	0.0824773
11	hsa-miR-106b*	4.65988	0.00211077	0.0459846		60	hsa-miR-130b*	215.273	0.0192817	0.0828298
12	hsa-miR-130a	3.93784	0.0018081	0.0459846		61	hsa-miR-380-5p	126.011	0.0192817	0.0828298
13	hsa-miR-210	2.45472	0.00211077	0.0459846		62	hsa-miR-1267	9.40979	0.0192817	0.0828298
14	hsa-miR-943	1198.95	0.00384437	0.0469013		63	hsa-miR-605	5.40395	0.0192817	0.0828298
15	hsa-miR-1303	628.394	0.00384437	0.0469013		64	hsa-miR-24	2.11935	0.0192817	0.0828298
16	hsa-miR-125a-3p	8.12922	0.00245929	0.0469013		65	hsa-miR-93	2.01779	0.0192817	0.0828298
17	hsa-miR-378-000567	6.77432	0.00331895	0.0469013		66	hsa-miR-572	6.0924	0.0217815	0.0874126
18	hsa-miR-625	4.33401	0.00285976	0.0469013		67	hsa-miR-543	4.43897	0.0217815	0.0874126
19	hsa-miR-130b	4.05436	0.00285976	0.0469013		68	hsa-miR-199a-5p	3.42911	0.0217815	0.0874126
20	hsa-miR-579	3.64184	0.00384437	0.0469013		69	hsa-miR-22*	2.71586	0.0217815	0.0874126
21	hsa-miR-1290	3.4124	0.00384437	0.0469013		70	hsa-miR-1225-3P	9.28396	0.0245588	0.0924745
22	hsa-miR-191*	2.87814	0.00384437	0.0469013		71	hsa-miR-505	3.64619	0.0245588	0.0924745
23	hsa-miR-320	2.08942	0.00285976	0.0469013		72	hsa-miR-144*	3.10584	0.0245588	0.0924745
24	hsa-miR-484	1.97807	0.00331895	0.0469013		73	hsa-miR-550-002410	2.33783	0.0245588	0.0924745
25	hsa-miR-324-5p	4.7287	0.00444431	0.0502042		74	hsa-miR-27b	3.34317	0.0276379	0.0991713
26	hsa-miR-584	2.888	0.00444431	0.0502042		75	hsa-miR-1180	2.54935	0.0276379	0.0991713
27	hsa-miR-136*	350.779	0.00678701	0.0713806		76	hsa-miR-181a-2*	2.22525	0.0276379	0.0991713
28	hsa-miR-331-5p	293.903	0.00678701	0.0713806		77	hsa-miR-501-3p	4.02754	0.0310442	0.107596
29	hsa-miR-550-001544	174.021	0.00778551	0.071957		78	hsa-miR-148a	2.54093	0.0310442	0.107596
30	hsa-miR-34b	4.242	0.00778551	0.071957		79	hsa-miR-148b*	5.77652	0.0348048	0.115385
31	hsa-miR-576-3p	2.66197	0.00778551	0.071957		80	hsa-miR-212	2.59111	0.0348048	0.115385
32	hsa-miR-324-3p	1.98258	0.00778551	0.071957		81	hsa-miR-200c	2.43986	0.0348048	0.115385
33	hsa-miR-659	470.585	0.00891366	0.0734775		82	hsa-miR-1275	447.397	0.0389477	0.11879
34	hsa-miR-378-002243	4.24348	0.00891366	0.0734775		83	hsa-miR-1262	235.429	0.0389477	0.11879
35	hsa-miR-151-5P	2.65296	0.00891366	0.0734775		84	hsa-miR-128	3.09246	0.0389477	0.11879
36	hsa-miR-545	234.122	0.0132235	0.0760975		85	hsa-miR-410	2.80376	0.0389477	0.11879
37	hsa-miR-18a*	8.76939	0.0132235	0.0760975		86	hsa-miR-1291	2.43369	0.0389477	0.11879
38	hsa-miR-382	6.95981	0.0116167	0.0760975		87	hsa-miR-328	2.28904	0.0389477	0.11879
39	hsa-miR-516-3p	6.69991	0.0116167	0.0760975		88	hsa-miR-338-5P	2.19218	0.0389477	0.11879
40	hsa-miR-597	6.07066	0.0116167	0.0760975		89	hsa-miR-486-3p	2.77227	0.0435022	0.125171
41	hsa-miR-339-5p	5.21105	0.0132235	0.0760975		90	hsa-miR-27a	2.59076	0.0435022	0.125171
42	hsa-miR-361-5p	4.57021	0.0101856	0.0760975		91	hsa-miR-671-3p	2.54208	0.0435022	0.125171
43	hsa-miR-340*	4.01447	0.0116167	0.0760975		92	hsa-miR-548c-5p	9.01244	0.0484986	0.134473
44	hsa-miR-29b	3.64442	0.0132235	0.0760975		93	hsa-miR-1825	2.59606	0.0484986	0.134473
45	hsa-miR-1285	3.11353	0.0132235	0.0760975		94	hsa-miR-363	2.58107	0.0484986	0.134473
46	hsa-miR-152	3.01682	0.0132235	0.0760975		95	hsa-miR-370	2.29294	0.0484986	0.134473
47	hsa-miR-21	2.78064	0.0132235	0.0760975			has-miR-146a	1.2	0.270812	0.378888
48	hsa-miR-30d	2.63041	0.0132235	0.0760975			hsa-miR-628-3p	1.74005	0.0276379	0.0991713
49	hsa-miR-331-3p	2.26826	0.0116167	0.0760975
Note: F.C.: Fold Change; P.: p-value; FDR: False Discovery Rate.
