# Supplementary material for: MicroRNA Array Analysis Finds Elevated Serum miR-1290 Accurately Distinguishes Patients with Low-Stage Pancreatic Cancer from Healthy and Disease Controls
Source: Oxford University Press journal article supplement (doi:10.1158/1078-0432.ccr-12-3092), 2013-05-23
Supplement: 10780432ccr123092-sup-table_s6.xlsx [file 10780432ccr123092-sup-table_s6.xlsx]

## Sheet: Suppl. Table S06 (HK)
Supplemental Table S6. Diagnostic performance of microRNAs measured by Taqman real-time PCR assays
No.	miRNA ID	PC vs. N							PC vs. CP
		AUC	95% CI	p.	Sensi. (%)	Speci. (%)	Cutoff		AUC	95% CI	p.	Sensi. (%)	Speci. (%)	Cutoff
1	miR-1290	0.96	0.91 to 1.00	<0.0001	87.8	84.2	125.63		0.81	0.71 to 0.91	<0.001	82.9	68.6	194.09
	(PC≤2.0cm)	0.959	0.89 to 1.00	<0.001	77.8	94.7	94.16		0.781	0.64 to 0.92	0.01	77.8	74.3	201.07
2	miR-550	0.738	0.60 to 0.87	0.003	73.2	57.9	3.79		0.631	0.51 to 0.76	0.049	51.2	68.6	6.62
3	miR-628-3p	0.823	0.71 to 0.94	<0.001	75	84.2	507.98		0.694	0.57 to 0.81	0.004	70.7	57.1	515.53
4	miR-1825	0.703	0.56 to 0.85	0.012	63.4	78.9	60.52		0.709	0.56 to 0.86	0.011	75.6	60	52.7
5	miR-24	0.791	0.68 to 0.90	<0.001	73.2	68.4	16.83		0.697	0.57 to 0.82	0.003	73.2	62.9	16.97
6	miR-134	0.801	0.69 to 0.92	<0.001	73.2	68.4	122.3		0.662	0.54 to 0.79	0.015	73.2	51.4	112.93
7	miR-146a	0.819	0.71 to 0.93	<0.001	78	78.9	32.11		0.782	0.68 to 0.89	<0.001	73.2	80	48.35
8	miR-200c	0.642	0.50 to 0.79	0.079	65.9	68.4	10.93		0.655	0.53 to 0.78	0.02	65.9	57.1	10.27
9	miR-378	0.805	0.69 to 0.92	<0.001	75.6	78.9	6.6		0.669	0.54 to 0.79	0.011	68.3	62.9	7.02
10	miR-484	0.782	0.66 to 0.90	<0.001	75.6	63.2	2.8		0.751	0.64 to 0.86	<0.001	68.3	68.6	3.6
11	miR-625	0.656	0.51 to 0.80	0.054	63.4	52.6	24.01		0.658	0.53 to 0.78	0.018	70.7	62.9	18.86
12	miR-22	0.729	0.59 to 0.86	0.005	70.7	78.9	31.03
13	miR-210	0.727	0.59 to 0.86	0.005	73.2	57.9	92.69
14	miR744*	0.691	0.54 to 0.84	0.018	68.3	52.6	47.83
	CA19-9	0.859	0.77 to 0.95	<0.001	70.7	89.5	16.81		0.714	0.60 to 0.83	0.001	70.7	62.9	19.53
Note: PC: pancreatic cancer; NET: pancreatic nuroendocrine tumor; CP: chronic pancreatitis; N: normal person; CN: chronic pancreatitis and normal person; NCN: pancreatic nuroendocrine tumor, chronic pancreatitis and normal person; AUC: area under ROC curve; P: p-value (Mann-Whitney).
Supplemental Table S6. Diagnostic performance of microRNAs measured by Taqman real-time PCR assays (Cont'd)
No.	miRNA ID	PC vs. NET							PC vs. CN
		AUC	95% CI	p.	Sensi. (%)	Speci. (%)	Cutoff		AUC	95% CI	p.	Sensi. (%)	Speci. (%)	Cutoff
3	miR-1290	0.802	0.67 to 0.93	<0.001	80.5	61.1	211.06		0.863	0.79 to 0.94	<0.001	82.9	77.8	127.4
	(PC≤2.0cm)	0.765	0.58 to 0.95	0.027	77.8	61.1	218.05		0.844	0.74 to 0.95	0.001	77.8	81.5	201.07
1	miR-550	0.7	0.56 to 0.84	0.015	61.1	65.9	4.2		0.669	0.56 to 0.78	0.005	65.9	55.6	4.41
2	miR-628-3p	0.678	0.53 to 0.83	0.031	73.2	55.6	516.56		0.74	0.64 to 0.84	<0.001	73.2	66.7	515.53
4	miR-1825	0.715	0.58 to 0.85	0.009	73.2	61.1	47.03		0.714	0.58 to 0.85	0.011	68.3	64.8	55.76
5	miR-24								0.73	0.63 to 0.83	<0.001	65.9	75.9	22.31
6	miR-134								0.711	0.61 to 0.81	<0.001	65.9	63	122.3
7	miR-146a								0.795	0.70 to 0.89	<0.001	78	70.4	32.14
8	miR-200c								0.65	0.54 to 0.76	0.012	65.9	61.1	10.93
9	miR-378								0.717	0.61 to 0.82	<0.001	70.7	70.4	6.86
10	miR-484								0.762	0.67 to 0.86	<0.001	75.6	63	3.21
11	miR-625								0.657	0.56 to 0.77	0.009	70.7	57.4	18.86
12	miR-22
13	miR-210
14	miR744*
	CA19-9	0.816	0.69 to 0.94	<0.001	70.7	77.8	19.6		0.765	0.67 to 0.87	<0.001	70.7	74.1	19.53
Supplemental Table S6. Diagnostic performance of microRNAs measured by Taqman real-time PCR assays (Cont'd)
No.	miRNA ID	PC vs. NCN
		AUC	95% CI	p.	Sensi. (%)	Speci. (%)	Cutoff
3	miR-1290	0.85	0.78 to 0.92	< 0.001	82.9	73.6	127.4
	(PC≤2.0cm)	0.82	0.72 to 0.93	0.002	77.8	76.4	218.05
1	miR-550	0.68	0.58 to 0.78	0.001818	48.8	75	6.62
2	miR-628-3p	0.724	0.63 to 0.82	<0.001	73.2	65.3	516.56
4	miR-1825	0.711	0.61 to 0.81	<0.001	65.9	63.9	55.76
5	miR-24
6	miR-134
7	miR-146a
8	miR-200c
9	miR-378
10	miR-484
11	miR-625
12	miR-22
13	miR-210
14	miR744*
	CA19-9	0.78	0.69 to 0.87	<0.001	71	78	19.6
