# Supplementary material for: MicroRNA Array Analysis Finds Elevated Serum miR-1290 Accurately Distinguishes Patients with Low-Stage Pancreatic Cancer from Healthy and Disease Controls
Source: Oxford University Press journal article supplement (doi:10.1158/1078-0432.ccr-12-3092), 2013-05-23
Supplement: 10780432ccr123092-sup-table_s7.xlsx [file 10780432ccr123092-sup-table_s7.xlsx]

## Sheet: Suppl. Table S7 
Supplemental Table S7. Univariate and multivariate analysis of serum miR-1290 and miR-486-3p and clinicopathologic factors associated with survival in pancreatic cancer
Variable	miR-486-3p								miR-1290
	Univariate analysis				Multivariate analysis				Univariate analysis				Multivariate analysis
	Hazard Ratio	95% CI	p-value		Hazard Ratio	95% CI	p-value		Hazard Ratio	95% CI	p-value		Hazard Ratio	95% CI	p-value
Differentiation (Poor)	1.426	0.794 to 2.562	0.235		(-)	(-)	(-)		1.426	0.794 to 2.562	0.235		(-)	(-)	(-)
Tumor Size (> 2.0cm)	0.928	0.445 to 1.936	0.841		(-)	(-)	(-)		0.928	0.445 to 1.936	0.841		(-)	(-)	(-)
pT classification (≥ T3)	2.296	1.099 to 4.797	0.027		0.948	0.270 to 3.325	0.934		2.296	1.099 to 4.797	0.027		0.55	0.165 to 1.837	0.331
pN classification (N1)	1.99	1.003 to 3.951	0.049		0.469	0.174 to 1.264	0.134		1.99	1.003 to 3.951	0.049		0.599	0.230 to 1.564	0.296
Stage (> I)	3.305	1.386 to 7.882	0.007		8.418	1.500 to 47.228	0.015		3.305	1.386 to 7.882	0.007		10.201	1.783 to 58.356	0.009
Serum miRNAs level (High)	1.901	1.020 to 3.542	0.043		2.627	1.296 to 5.325	0.007		1.961	1.032 to 3.728	0.04		2.241	1.160 to 4.330	0.016
Supplemental Table S6. Univariate and multivariate analysis of serum miR-1290 and miR-486-3p and clinicopathologic factors associated with survival in pancreatic cancer
Variable	Combined miR-486-3p and miR1290
	Univariate analysis				Multivariate analysis
	Hazard Ratio	95% CI	p-value		Hazard Ratio	95% CI	p-value
Differentiation (Poor)	1.426	0.794 to 2.562	0.235		(-)	(-)	(-)
Tumor Size (> 2.0cm)	0.928	0.445 to 1.936	0.841		(-)	(-)	(-)
pT classification (≥ T3)	2.296	1.099 to 4.797	0.027		0.81	0.237 to 2.771	0.736
pN classification (N1)	1.99	1.003 to 3.951	0.049		0.514	0.194 to 1.357	0.179
Stage (> I)	3.305	1.386 to 7.882	0.007		7.893	1.400 to 44.509	0.019
Serum miRNAs level (High)	2.13	1.158 to 3.918	0.015		2.361	1.243 to 4.483	0.009
